# Supplementary material for: Whole Exome Sequencing Reveals Compound Heterozygosity for Ethnically Distinct PEX7 Mutations Responsible for Rhizomelic Chondrodysplasia Punctata, Type 1
Source: Hindawi journal article supplement (doi:10.1155/2015/454526), 2015-01-01
Supplement: f1 [file 454526.f1.pdf]

**Supplementary Figures**

**Supplementary Figure 1: Case 1 and 2 radiographs**

A) Case 1, 12 years of age: Plain radiograph of the left knee demonstrating metaphyseal splaying and punctate patellar ossification centre. B) Case 1, 14 years: Plain radiograph of left humerus demonstrating both proximal and distal metaphyseal splaying. C) Case 2, 12 years: Plain radiograph of the pelvis demonstrating marked flattening of the femoral heads with epiphyseal dysplasia and metaphyseal flaring. D) Case 2, 12 years: Plain radiograph of the chest demonstrating stippled epiphysis of the left shoulder and bilateral metaphyseal splaying.

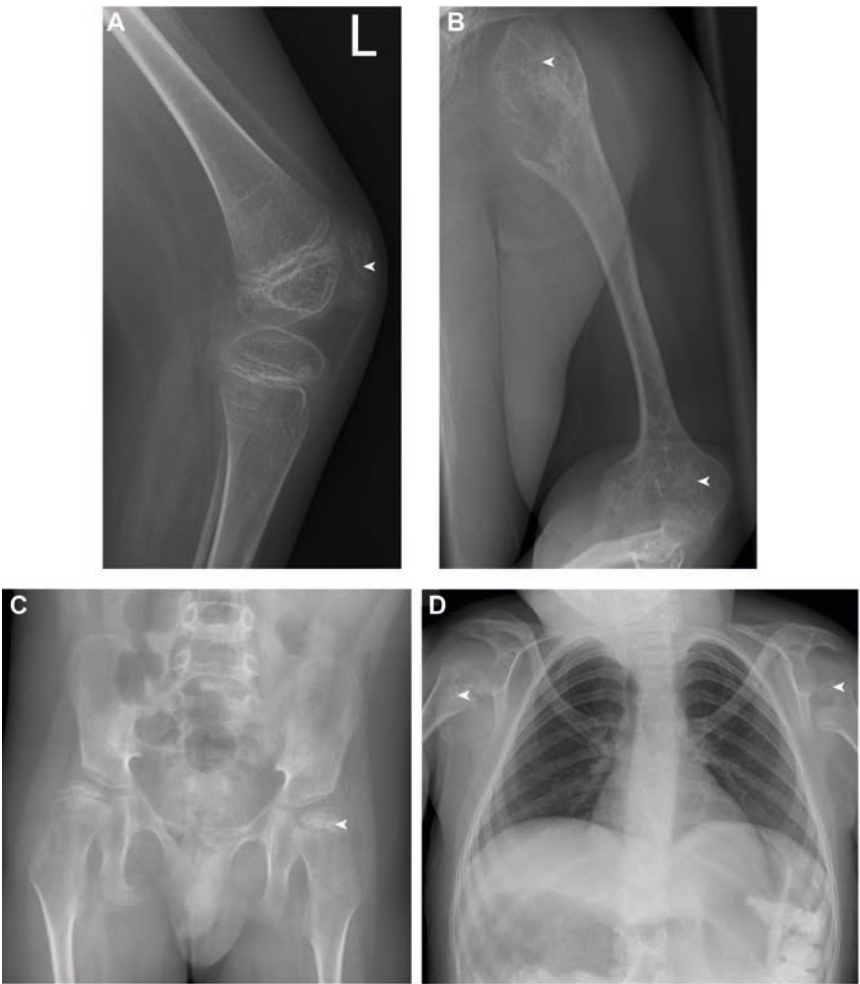

305    Supplementary Figure 2: Case 1 and 2 magnetic resonance imaging

306    A) Case 1, 10 years: Sagittal T1 MRI demonstrating small cerebellar vermis and mildly  
307    hypoplastic pons. B) Case 2, 17 years: Coronal T2 MRI demonstrating hypoplastic  
308    cerebellum with prominent folia and increased CSF space in the posterior fossa. C) Case 2,  
309    17 years: Sagittal T2 MRI demonstrating cerebellar atrophy and mild atrophy of pons.

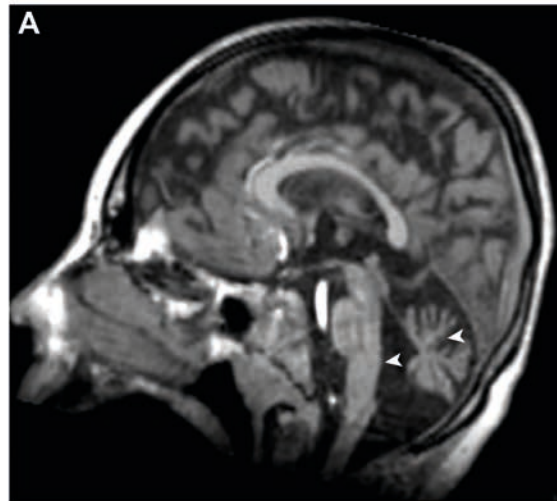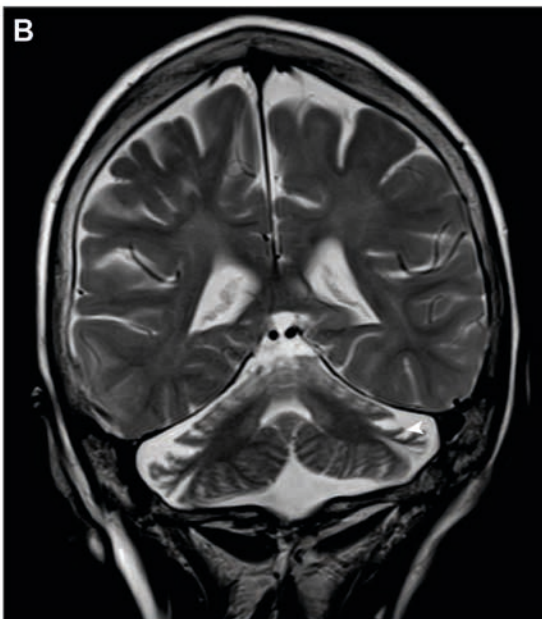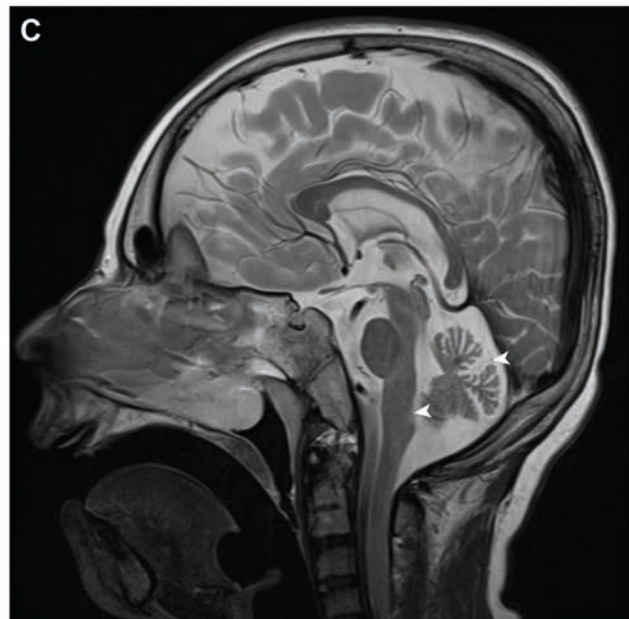

310

311

312     **Supplementary Tables**

313     Supplementary Table 1: Biochemical investigations

314     Abnormal biochemical investigations performed on case 1 at 6 years after being seen in  
315     Gottingen, Germany and case 2 at 6 months, 17 years and 18 years. These results  
316     demonstrate the fluctuating levels of phytanic acid and show the importance of testing  
317     plasmalogen levels to exclude or confirm RCDP1. Abnormal results are in bold. Normal  
318     ranges are in brackets and differ depending on the lab and methodology.

| Investigation                                                   | Case 1 (6 years)                                                           | Case 2 (6 months)                      | Case 2 (17 years)                                                                                                                                                                                                                               | Case 2 (18 years)                                 |
|-----------------------------------------------------------------|----------------------------------------------------------------------------|----------------------------------------|-------------------------------------------------------------------------------------------------------------------------------------------------------------------------------------------------------------------------------------------------|---------------------------------------------------|
| Plasma Hexacosanoate C26:0                                      | Not done                                                                   | Not done                               | <b>0.29 <math>\mu\text{mol/L}</math></b> (0.33-1.13)                                                                                                                                                                                            | Not done                                          |
| Plasma C24:0/C22:0 ratio                                        | Not done                                                                   | Not done                               | <b>0.006</b> (0.007-0.023)                                                                                                                                                                                                                      | <b>0.512</b> (0.55-1.115)                         |
| Plasma C26:0/C22:0 ratio                                        | Reported as 'normal' - data unavailable                                    | 0.087 (<0.15)                          | 0.56 (0.60-1.02)                                                                                                                                                                                                                                | 0.008 (<0.035)                                    |
| Plasma Phytanic acid (3,7,11,15-tetramethyl hexadecanoic acid)  | <b>60 <math>\mu\text{g/ml}</math></b> (<30)<br>Repeat: 27 $\mu\text{g/ml}$ | Not done                               | <b>43.27 <math>\mu\text{mol/L}</math></b> (0.82-11.09)<br>Repeat: Reported as non-specifically abnormal in a pattern not suggestive of an inborn error of metabolism                                                                            | <b>1.2 <math>\text{mg/100mL}</math></b> (<0.7)    |
| Plasma Pristanic acid (2,6,10,14-tetramethylpentadecanoic acid) | Not done                                                                   | Not done                               | <b>Not detected</b>                                                                                                                                                                                                                             | Not done                                          |
| Erythrocyte C16:0 plasmalogens                                  | Not done                                                                   | Not done                               | Not done                                                                                                                                                                                                                                        | <b>11 <math>\mu\text{g/g Hb}</math></b> (140-300) |
| Erythrocyte C18:0 plasmalogens                                  | Not done                                                                   | Not done                               | Not done                                                                                                                                                                                                                                        | <b>27 <math>\mu\text{g/g Hb}</math></b> (265-475) |
| Skin fibroblast catalase activity                               | Not done                                                                   | 10.2 $\mu\text{mol/min/mg}$ (4.5-20.0) | Not done                                                                                                                                                                                                                                        | Not done                                          |
| Cerebrospinal fluid monoamine metabolites                       | Not done                                                                   | Not done                               | Neopterin <b>91.7 <math>\text{nmol/L}</math></b> (6.0-30.0)<br>Biopterin 33.3 $\text{nmol/L}$ (25-45)<br>5-hydroxyindolacetic acid <b>0.26 <math>\mu\text{mol/L}</math></b> (0.06-0.19)<br>Homovanillic acid 0.30 $\mu\text{mol/L}$ (0.09-0.37) | Not done                                          |

320  
321     Supplementary Table 2: Variant filtering

|                                                                                | homoz<br>rec<br>model | homoz<br>rec<br>model | comp<br>rec<br>model | comp<br>rec<br>model |
|--------------------------------------------------------------------------------|-----------------------|-----------------------|----------------------|----------------------|
|                                                                                | Variants              | Genes                 | Variants             | Genes                |
| Variants with concordant genotype                                              | 19,439                | 7,703                 | 27,355               | 8,522                |
| Alternate allele frequency $\leq 0.2$ in ESP, 1000G, HapMap, or ExAc Europeans | 4,275                 | 2,809                 | 6,794                | 3,926                |
| Genotype frequency $\leq 0.02$ (homoz) or $\leq 0.2$ (comp) in control exomes  | 114                   | 108                   | 1,447                | 1,254                |
| Potentially functional                                                         | 1                     | 2                     | 236                  | 232                  |
| Located in genes with > 1 rare functional variant                              | n/a                   | n/a                   | 8                    | 4                    |
| Located in known cerebellar ataxia/atrophy gene                                | 0                     | 0                     | 2                    | 1                    |

## Supplementary Methods

### *Whole exome sequencing*

DNA was extracted from whole blood and exome capture was performed using the Agilent SureSelect Human All Exon V5 kit, followed by paired-end sequencing (Illumina HiSeq 2000/2500). 58 million reads were obtained for each sibling and mapped to GRCh37.p13 reference genome using Burrows-Wheeler Aligner (v0.7.10[17]), followed by identification of PCR and optical duplicates with Picard (v1.96, [picard.sourceforge.net](http://picard.sourceforge.net)). Reads were realigned around indels and base quality scores were recalibrated with the GenomeAnalysis Toolkit (GATK v3.3-0[18]). Variants in the targeted regions and flanking 50 nucleotides were identified using the GATK HaplotypeCaller algorithm after supplementing exome alignments from 124 unrelated European control individuals to support variant discovery and empower variant quality score recalibration[19]. Variants discovered in each patient were annotated using SeattleSeq Annotation 138[20], snpEff (v3.5[21]), and custom scripts. Variants were considered potentially functional if they resulted in gain or loss of a stop or start codon, caused a frameshift, codon deletion or insertion, non-synonymous amino acid substitution, located in the 5'- or 3'-untranslated regions or were within 5 nucleotides of a splice consensus motif. Alleles were considered 'frequent' if their frequencies exceeded 0.2 in the European subsets of the HapMap, 1000 Genomes, NHLBI Exome Sequencing Project, or Exome Aggregation Consortium cohorts[11], or if the genotype frequency in 123 New Zealand control exomes exceeded 0.2 (for heterozygous variants) or 0.02 (for homozygous variants).

### *Mutation validation/PCR and Sanger sequencing*

348 PCR amplification of each of the *PEX7* variants was performed using standard conditions  
349 with the following primers (PEX7 F1 5' TCAAAAATGACTCCTTGGTTCA 3' and PEX7 R1 5'  
350 TTTTTCCTAATTTTAGCTTTCA 3'; PEX7 F2 5' GGCTGAGCCTGTTTGGATAA 3' and PEX7 R2  
351 5' TCCTGGGAAGGTCCTTTTT 3'). PCR products were Sanger sequenced using the Applied  
352 Biosystems 3130XL Genetic Analyser at the Centre for Genomics and Proteomics at The  
353 University of Auckland. Both mutations were independently validated using whole exome  
354 sequencing at the Academic Medical Center (AMC) in the Netherlands.
